# Supplementary material
Source: HighWire-hosted journal article supplement (http://www.qdcxjkg.com/highwire/filestream/113988/field_highwire_adjunct_files/0/ERJ-01240-2012_Disclosures.pdf)
Supplement: ERJ-01240-2012_Disclosures.pdf [file ERJ-01240-2012_Disclosures.pdf]

**D.W. Reid.** In 2007, D.W. Reid received one year of funding support from Novartis Pharmaceuticals to investigate the anti-bacterial effects of their iron chelator deferasirox. This was an investigator conceived and driven study with freedom of publication.
